# Supplementary material for: Magnetic order in a novel 3D oxalate-based coordination polymer {[Cu(bpy)3][Mn2(C2O4)3]·H2O}n
Source: Royal Society of Chemistry journal article supplement (doi:10.1039/c5dt02933c), 2015-01-01
Supplement: c5dt02933c1.pdf [file c5dt02933c1.pdf]

## Supporting Information for

### Magnetic order in a novel 3D oxalate-based coordination polymer

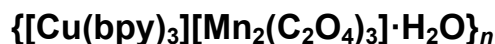

Marijana Jurić,<sup>a\*</sup> Damir Pajić,<sup>b</sup> Dijana Žilić,<sup>a</sup> Boris Rakvin,<sup>a</sup>  
Krešimir Molčanov<sup>a</sup> and Jasminka Popović<sup>a</sup>

<sup>a</sup> Ruđer Bošković Institute, Bijenička cesta 54, 10000 Zagreb, Croatia

<sup>b</sup> Department of Physics, Faculty of Science, University of Zagreb, Bijenička cesta 32,  
10000 Zagreb, Croatia

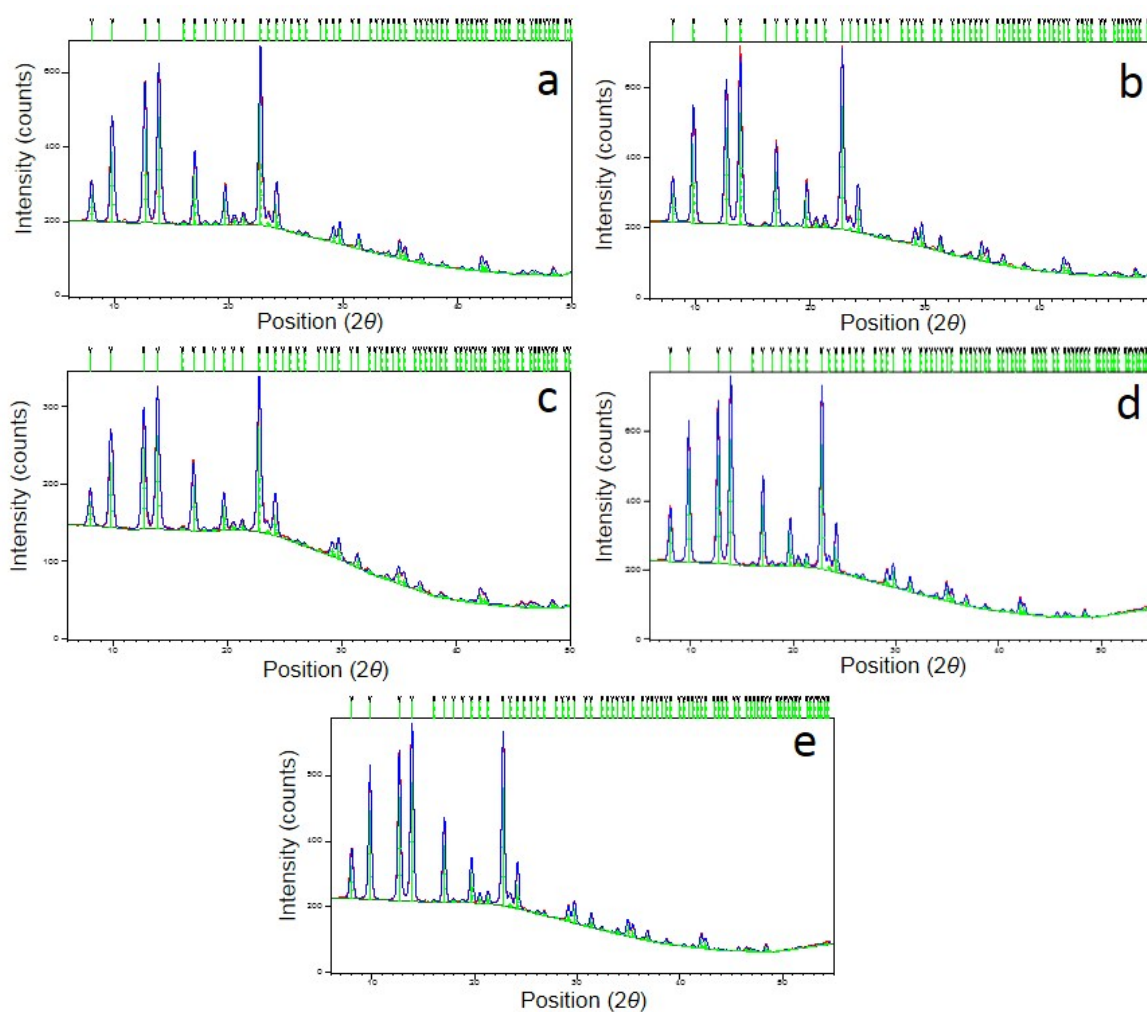

**Fig. S1** Graphical results of the Rietveld refinement for five various samples of  $\{[\text{Cu}(\text{bpy})_3][\text{Mn}_2(\text{C}_2\text{O}_4)_3]\cdot\text{H}_2\text{O}\}_n$  (**1**): (a) sample exposed to the air during 24 h, (b) sample exposed to the air during 60 days, (c) sample after immersion in ethanol, (d) sample after immersion in methanol, (e) sample after immersion in acetonitrile. The experimental data are shown in the red, the calculated pattern in blue, while the green vertical marks represent the diffraction lines of  $\{[\text{Cu}(\text{bpy})_3][\text{Mn}_2(\text{C}_2\text{O}_4)_3]\cdot\text{H}_2\text{O}\}_n$ .
